# Supplementary material for: Single-cell genomics unveils a canonical origin of the diverse mitochondrial genomes of euglenozoans
Source: PubMed Central journal article supplement (PMC8130358; doi:10.1186/s12915-021-01035-y), 2021-05-17
Supplement: 12915_2021_1035_MOESM2_ESM.pdf [file 12915_2021_1035_MOESM2_ESM.pdf]

## **Single-cell genomics unveils a canonical origin of the diverse mitochondrial genomes of euglenozoans**

Kristína Záhonová<sup>1,2</sup>, Gordon Lax<sup>3</sup>, Savar D. Sinha<sup>4</sup>, Guy Leonard<sup>5</sup>, Thomas A. Richards<sup>5</sup>, Julius Lukeš<sup>1,6,\*</sup>, Jeremy G. Wideman<sup>4,\*</sup>

<sup>1</sup> Institute of Parasitology, Biology Centre, Czech Academy of Sciences, České Budějovice (Budweis), Czech Republic

<sup>2</sup> Faculty of Science, Charles University, BIOCEV, Vestec, Czech Republic

<sup>3</sup> Department of Botany, University of British Columbia, Vancouver, Canada

<sup>4</sup> Center for Mechanisms of Evolution, Biodesign Institute, School of Life Sciences, Arizona State University, Tempe, USA

<sup>5</sup> Department of Zoology, University of Oxford, Oxford, UK

<sup>6</sup> Faculty of Sciences, University of South Bohemia, České Budějovice (Budweis), Czech Republic

\* Corresponding authors: [jeremy.wideman@asu.edu](mailto:jeremy.wideman@asu.edu); [jula@paru.cas.cz](mailto:jula@paru.cas.cz)

**Additional file 2: Fig. S1-S7**

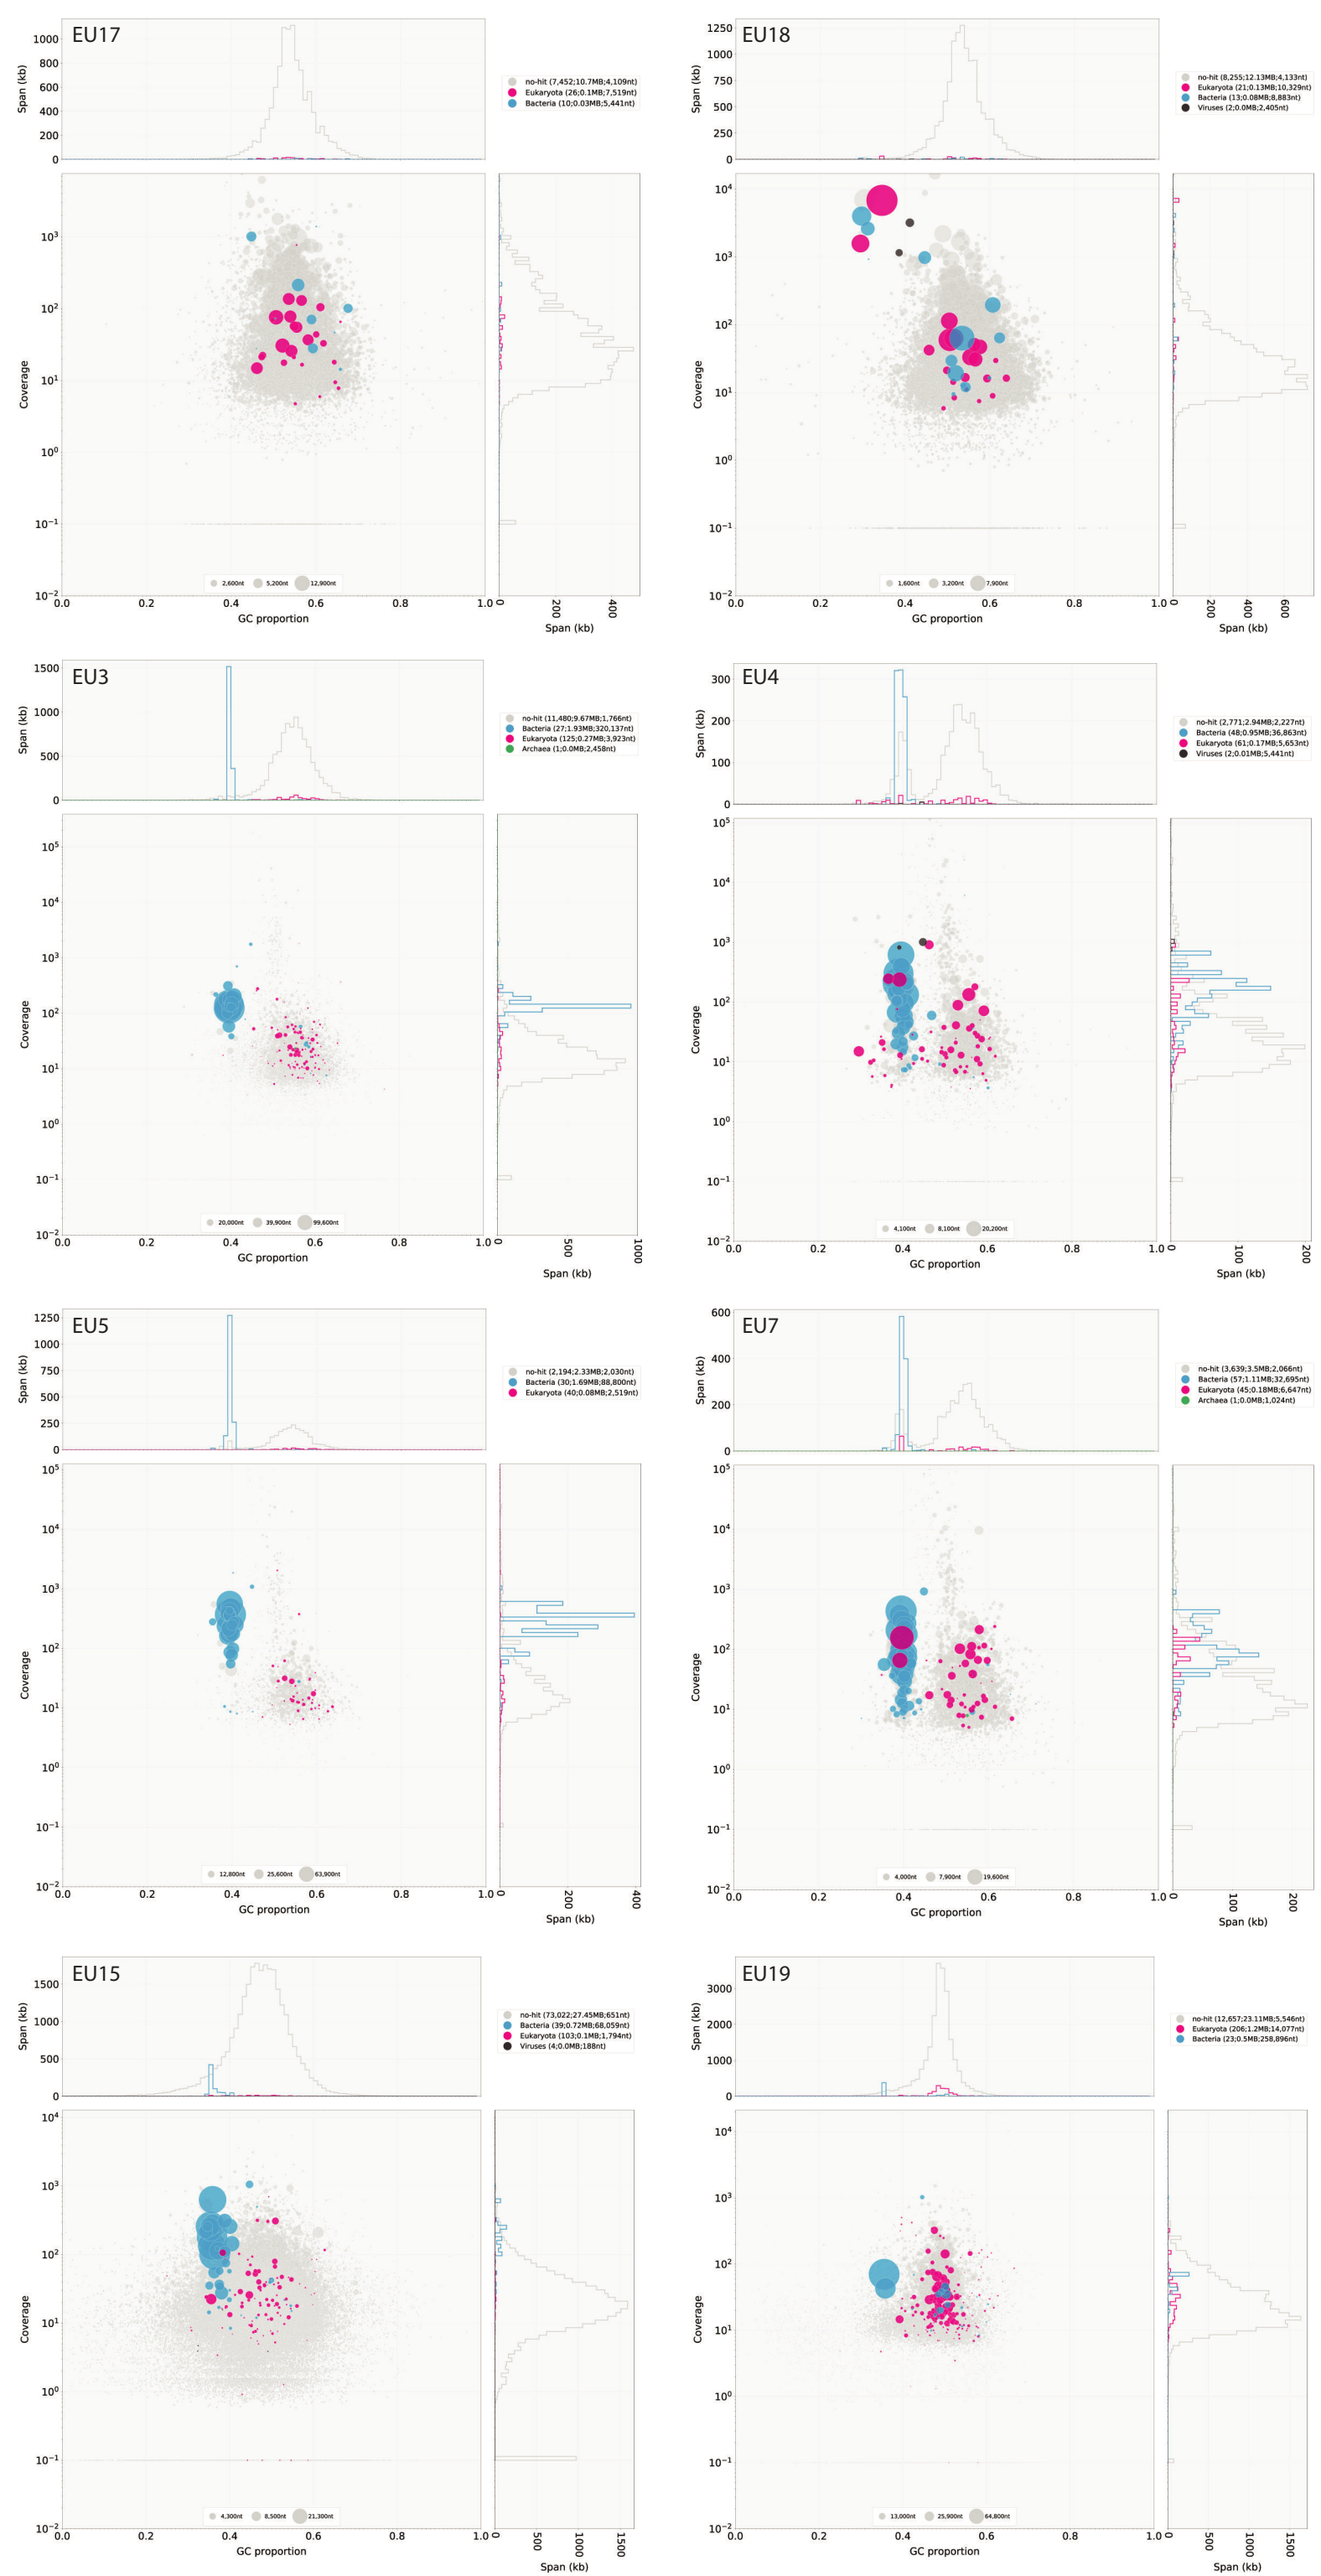

**Fig S1. BlobTools plots showing contamination of several sequenced SAGs.** The bacterial contamination is shown as blue circles, while sequences with eukaryotic signal are in magenta. For comparison, BlobTools plots for SAGs EU17 and EU18 are also shown.

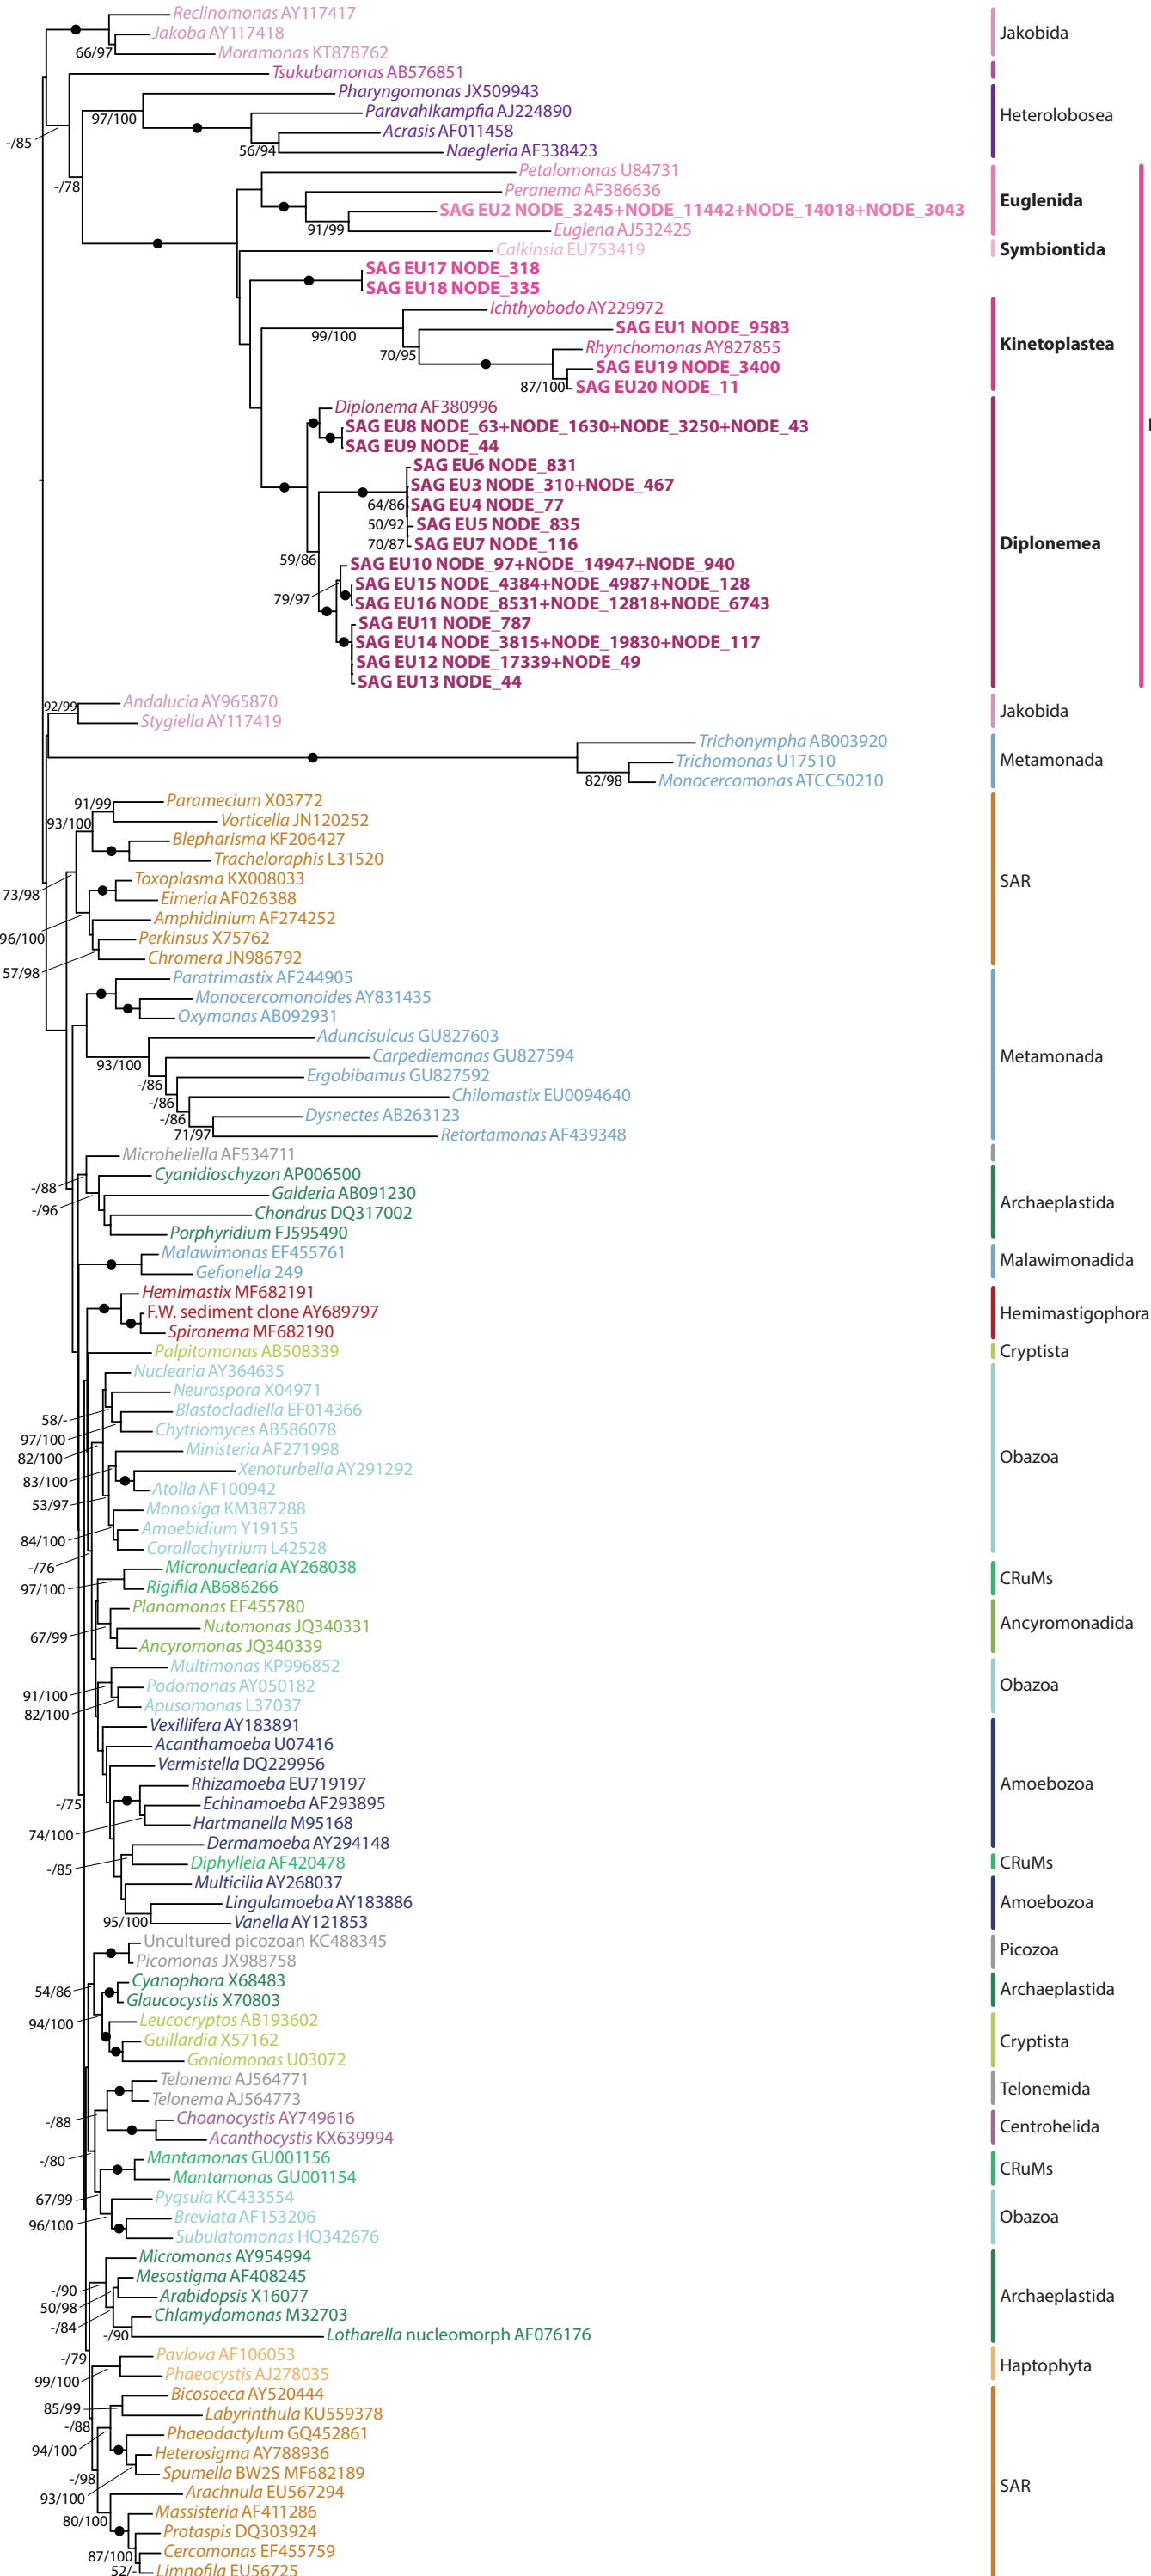

BS / UFB  
 0.1 substitution/site

Euglenozoa

**Fig S2. 18S rDNA phylogeny of eukaryotes.** The Maximum Likelihood phylogenetic tree was estimated from an alignment containing 131 taxa and 1,551 nucleotide positions under the GTR+ $\Gamma$  model with standard bootstrapping (BS) and ultrafast bootstrapping (UFB). Support values are shown if  $\geq 50\%$  and  $\geq 75\%$  for BS and UFB, respectively. Fully supported nodes are shown as black circles.

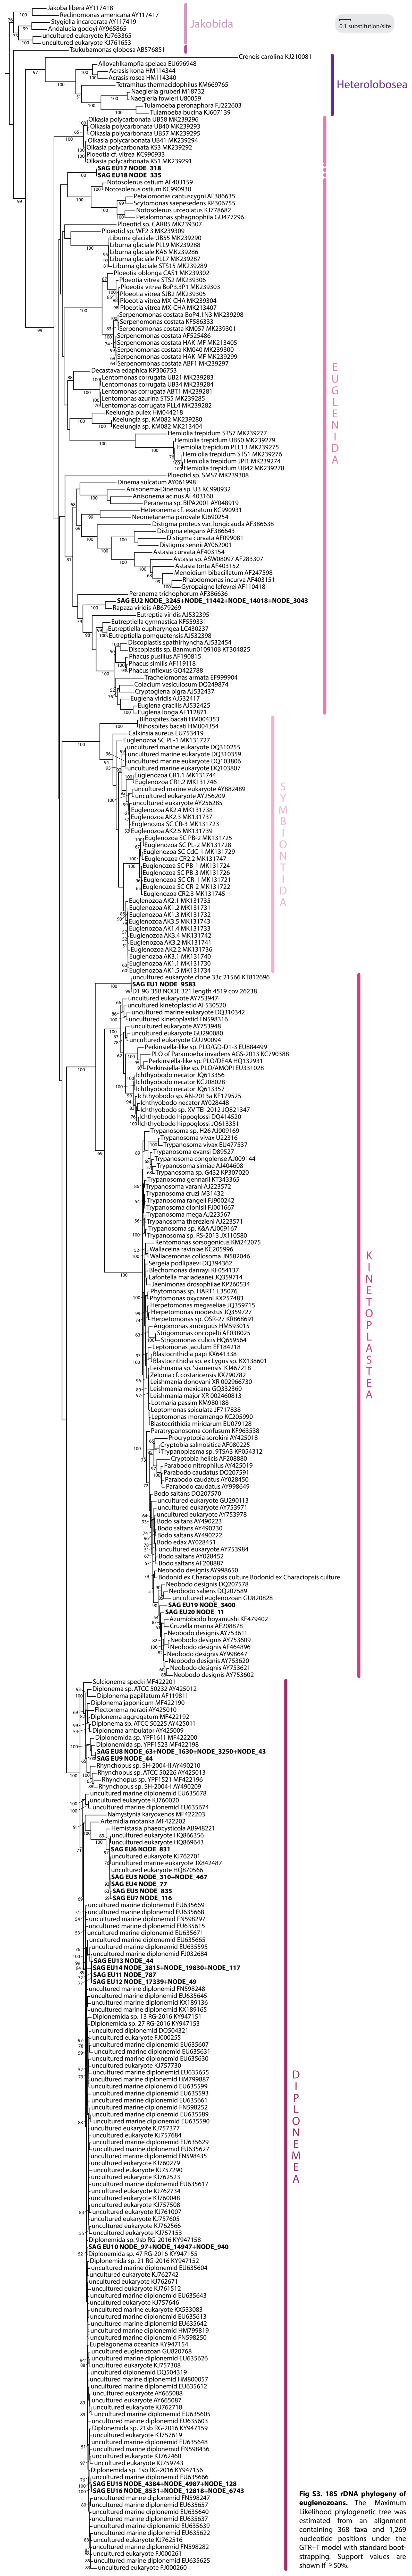

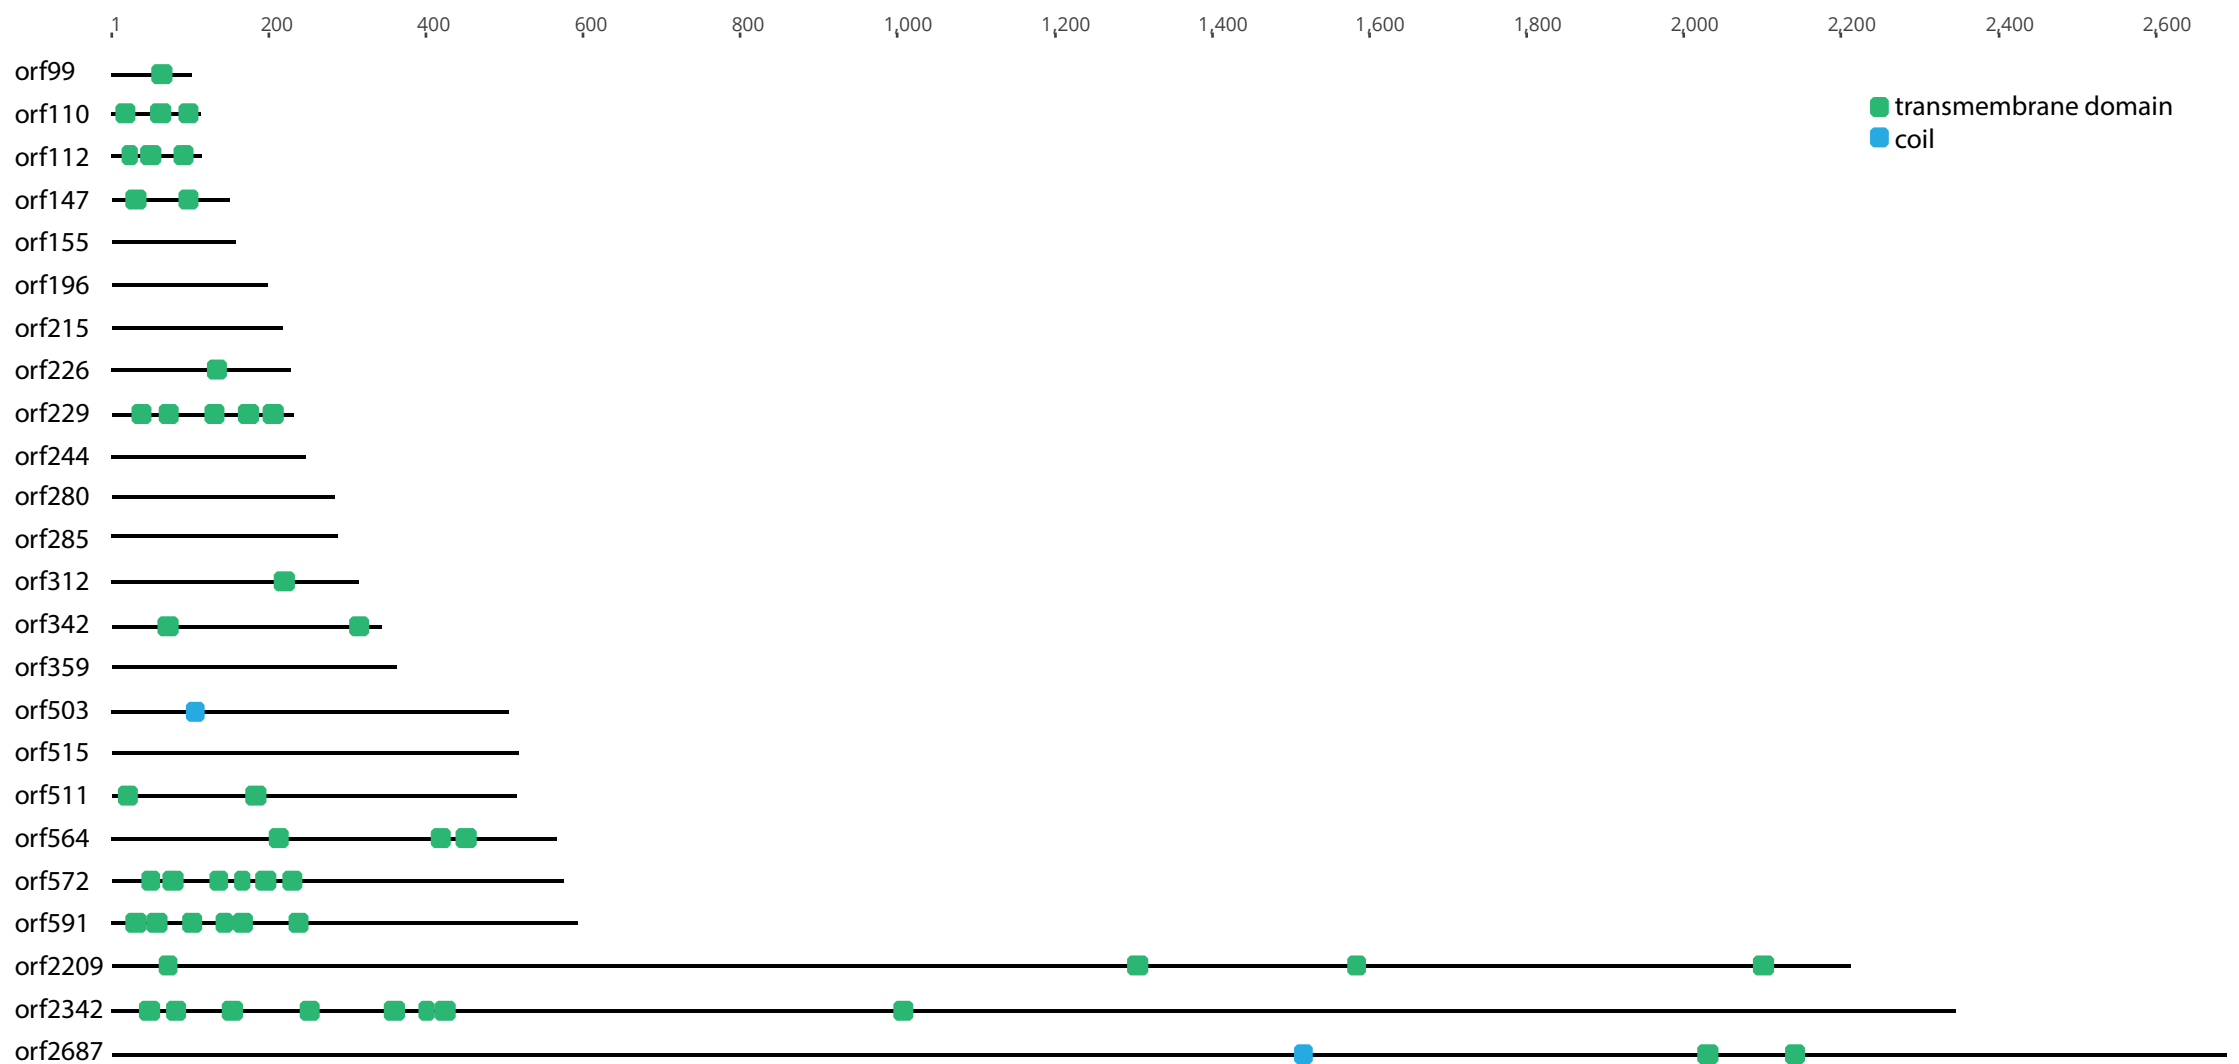

**Fig S4. Predicted domains in EU17/18 mtDNA-encoded ORFs.** ORFs annotated by MFannot ([https://megasun.bch.umontreal.ca/cgi-bin/dev\\_mfa/mfannotInterface.pl](https://megasun.bch.umontreal.ca/cgi-bin/dev_mfa/mfannotInterface.pl)) were submitted to anInterProScan [75] search. Predicted domains are highlighted as explained in the graphical legend.

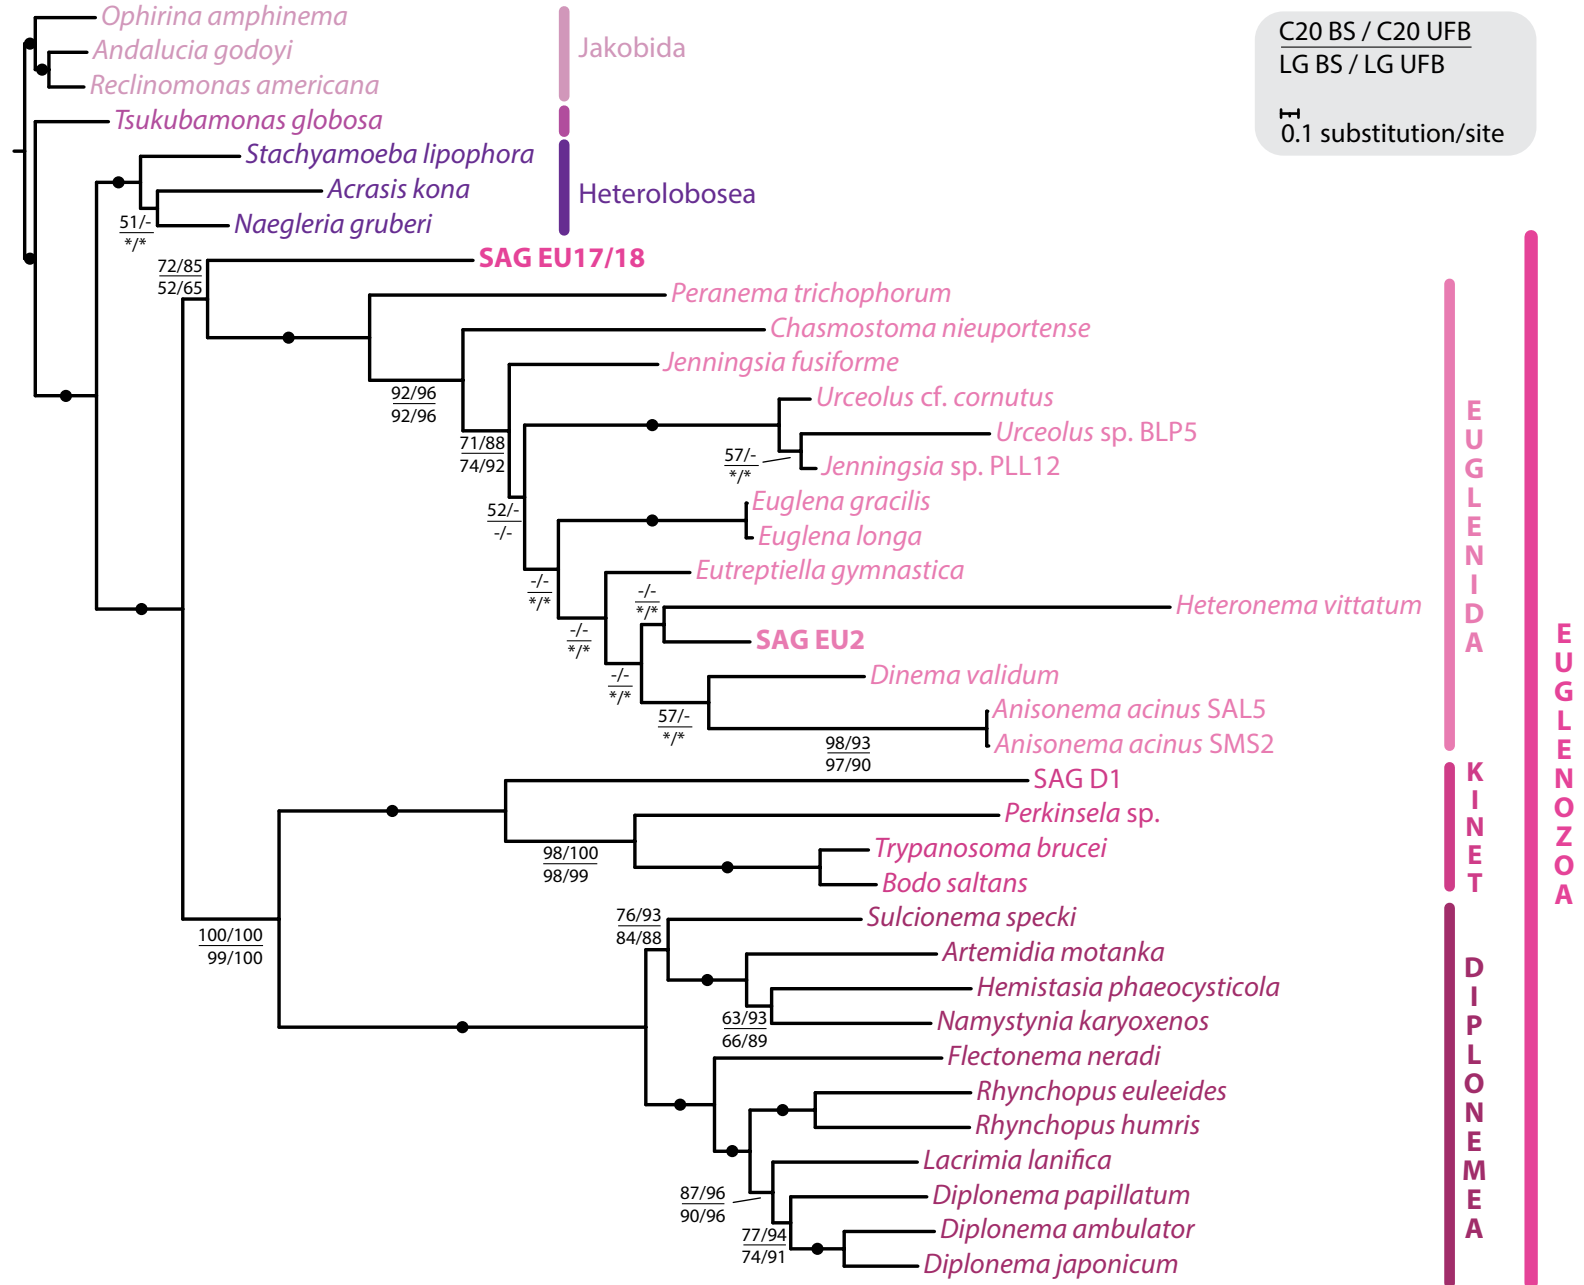

**Fig. S5. Concatenated mitochondrial phylogenetic analysis including atp6 from EU17/18.** The alignment contained 37 taxa and 4,348 amino acid positions, with EU17/18 missing 3.65% of data. The Maximum Likelihood tree was estimated under two models, LG+C20+F+ $\Gamma$  (C20) and LG+F+I+G4 (LG; the best-fitting model as determined by IQ-TREE), with 1,000 standard bootstraps (BS) and 1,000 ultrafast bootstraps (UFB). The tree topology shown is from the C20 analysis. Support values for  $\leq 50\%$  BS and  $\leq 75\%$  UFB are denoted by a dash (-), whereas an asterisk (\*) marks a topology that does not exist in a particular analysis. Fully supported nodes are shown as black circles.

**a) trnK(ttt) alignment**

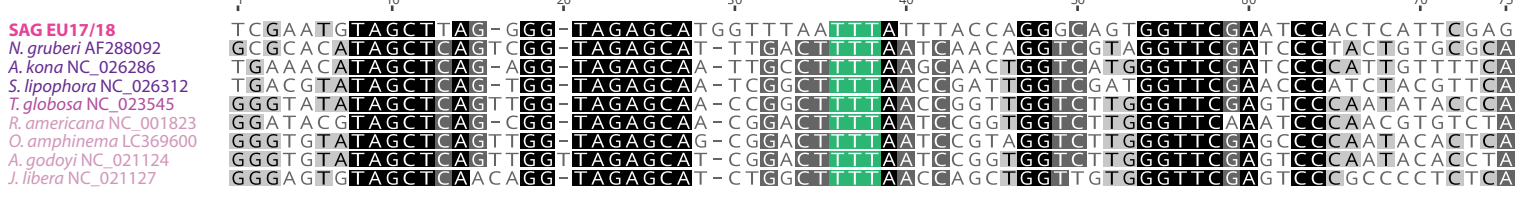

**b) trnM(cat) alignment**

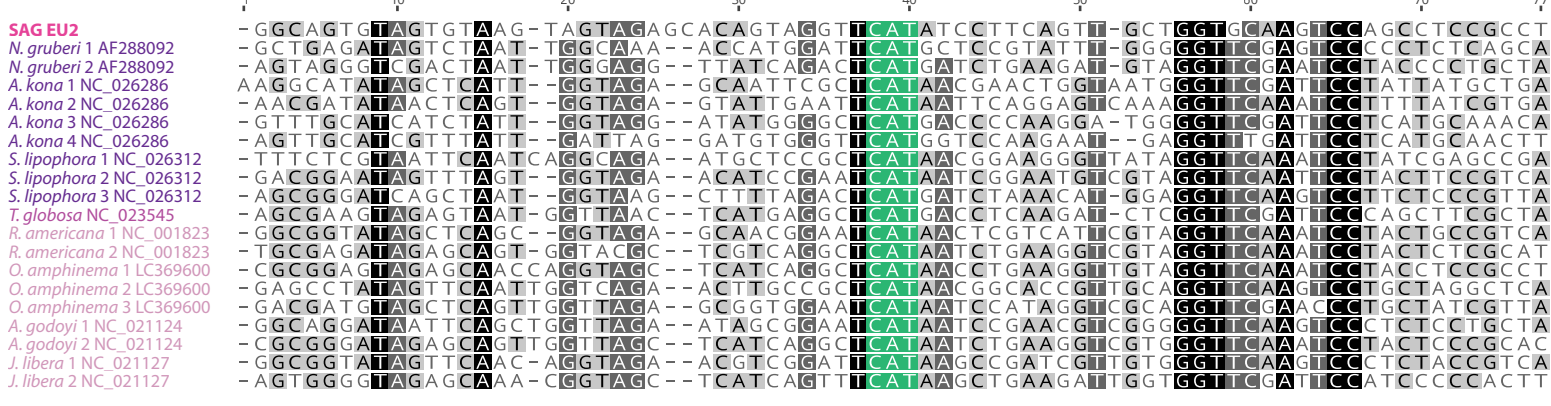

**c) trnK(ttt) structure**

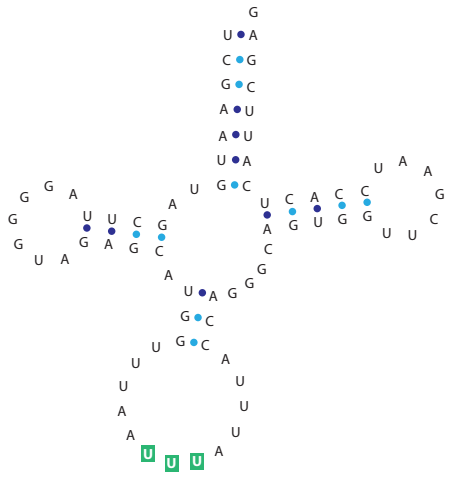

**d) trnM(cat) structure**

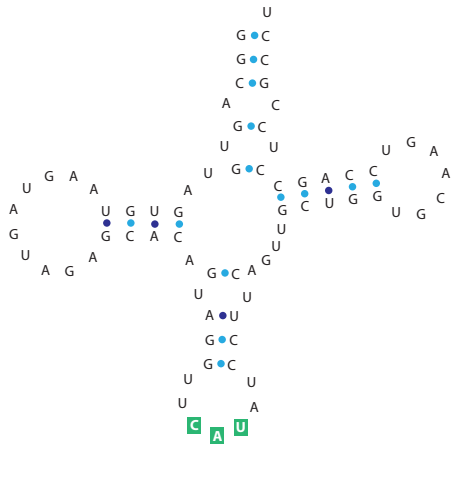

**Fig S6. Characterization of tRNAs encoded in mtDNA of EU17/18 and EU2.** **a-b)** Sequences of *trnK* (**a**) and *trnM* (**b**) were aligned with mitochondrially encoded tRNAs of other species of *Discoba*. Residue shading indicates sequence conservation. **c-d)** Secondary structures of *trnK* (**c**) and *trnM* (**d**) as predicted by tRNAScan-SE. Double and triple bonds are depicted as dark- and light-blue circles, respectively. Anticodons are highlighted with a green background. Since all other known euglenozoans import all tRNAs into mitochondria from the nucleus [47], we built tRNA alignments with homologues from the mtDNAs of other discobans to take into account different evolutionary pressures and mutational rates in nuclei and mitochondria [51]. The identity across nine *trnK* and 20 *trnM* sequences was 38.7% and 15.8%, respectively (**a-b**). Predicted secondary structures resembled other tRNAs supporting their functionality (**c-d**). While most eukaryotes have at least some tRNA mitochondrial-encoded, the long-standing paradigm was that euglenozoans and unrelated apicomplexans (which share with euglenozoans a range of unique features [77]) import all tRNAs from the cytosol [78]. This has significant consequences, since the bacterial-type translation system has to cope solely with the eukaryotic-type tRNAs [79].
